# Supplementary material
Source: PubMed Central journal article supplement (PMC3839088)
Supplement: NIHMS523960-supplement-02.pdf [file NIHMS523960-supplement-02.pdf]

# Supplementary Figure 1

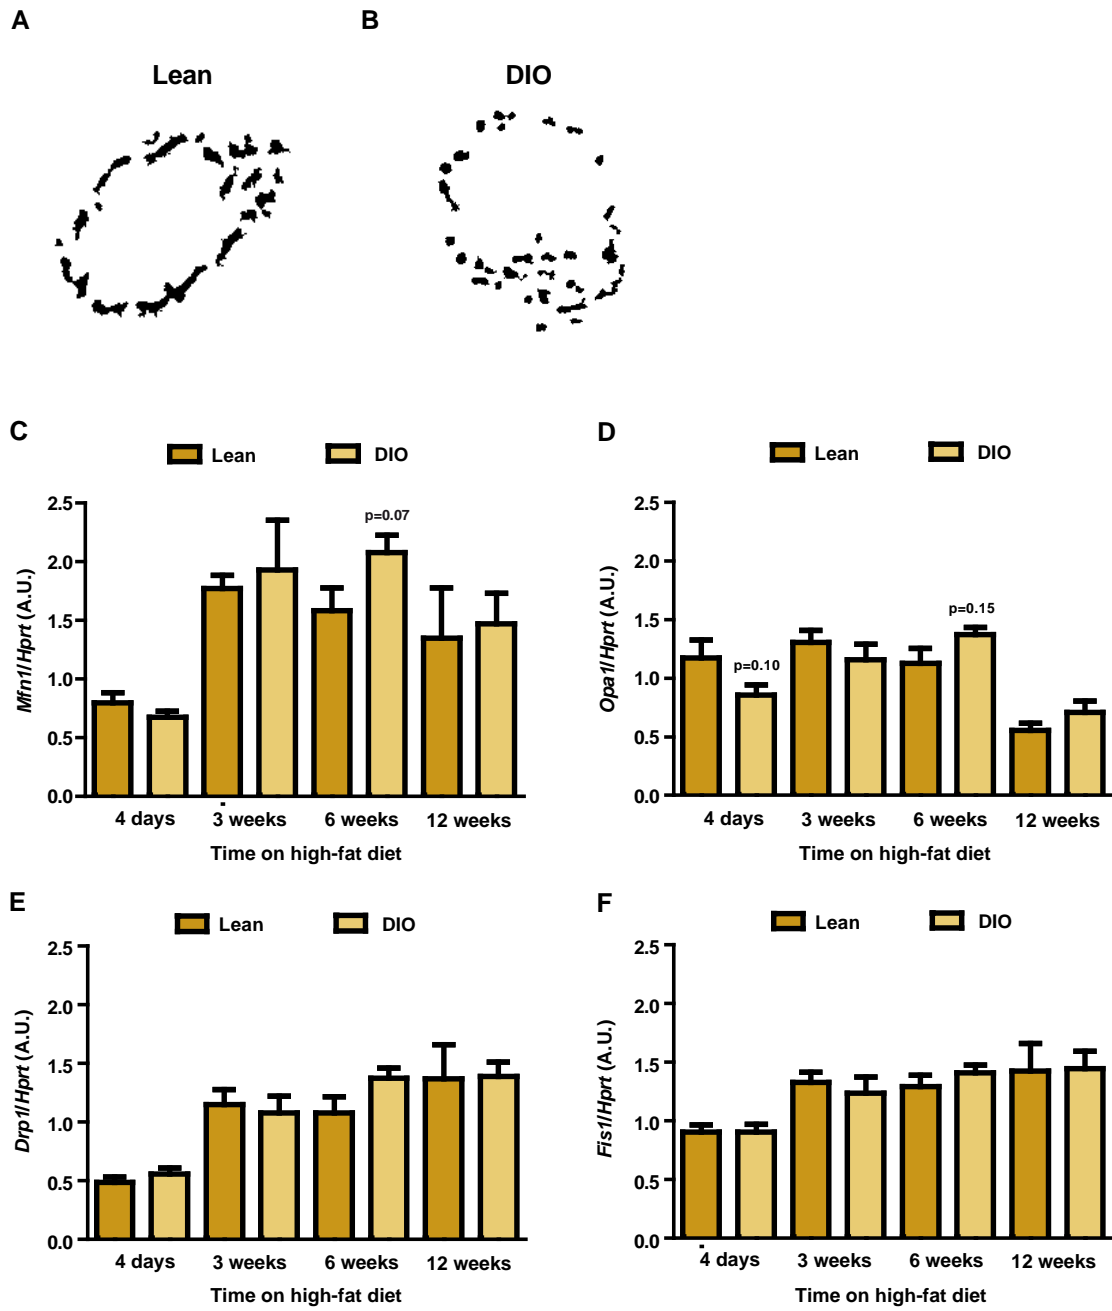

## Supplementary Figure 2

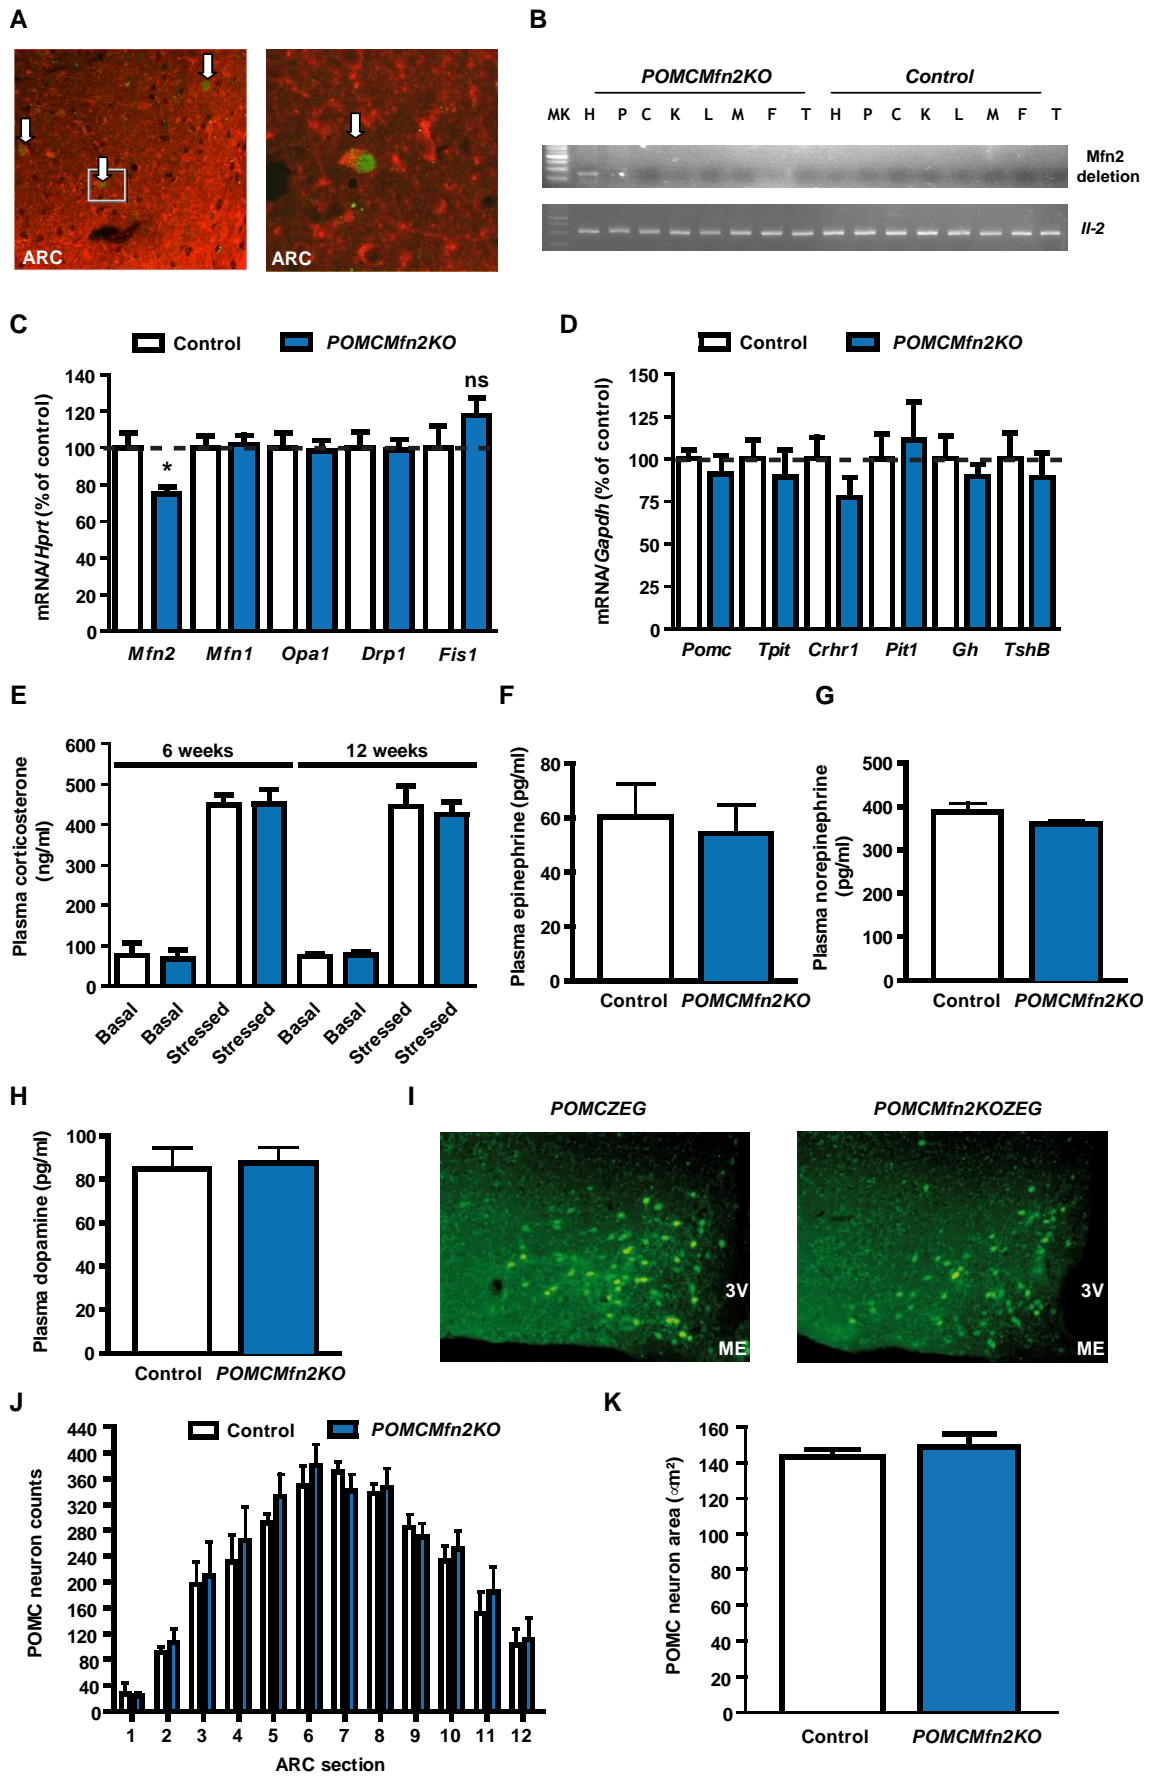

Supplementary Figure 3

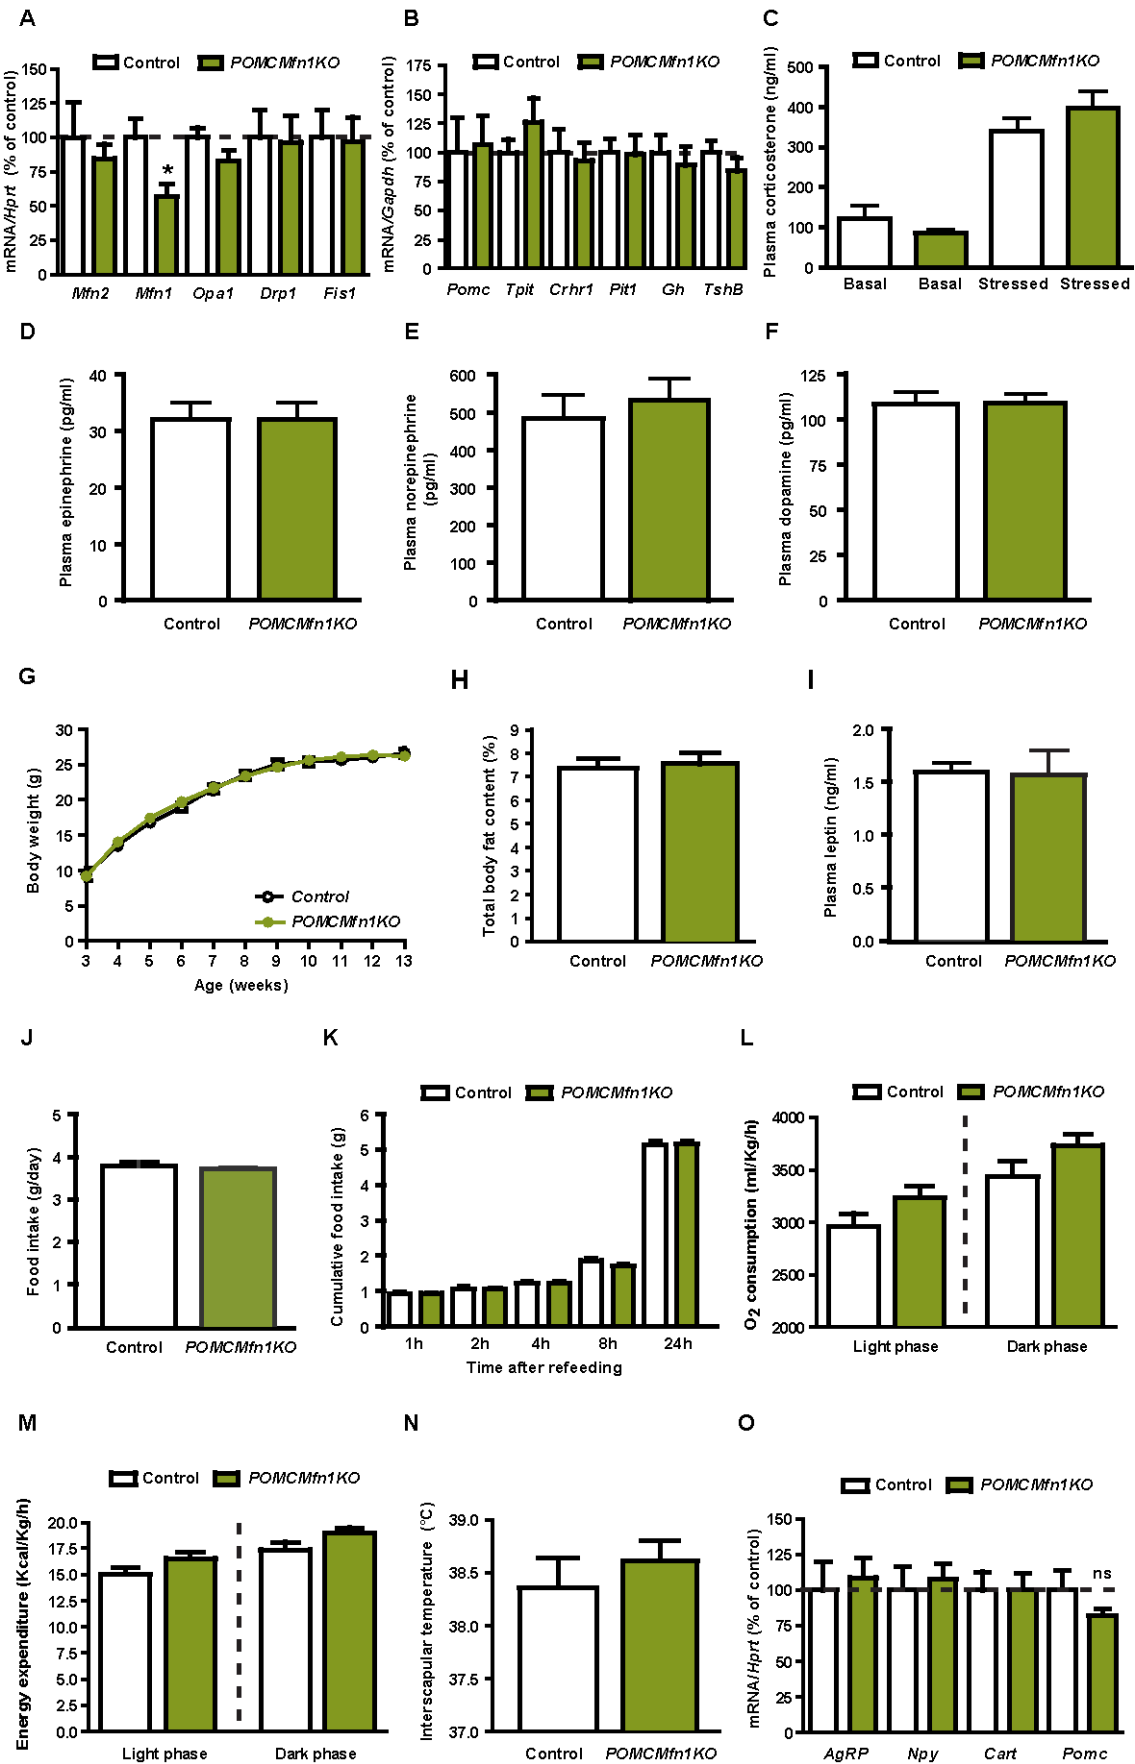

## Supplementary Figure 4

**A**

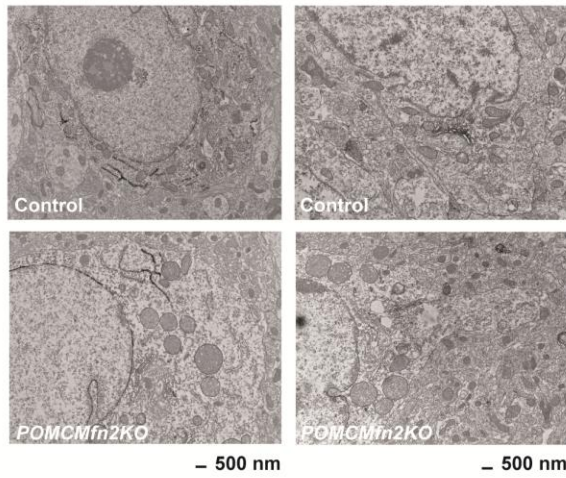

**B**

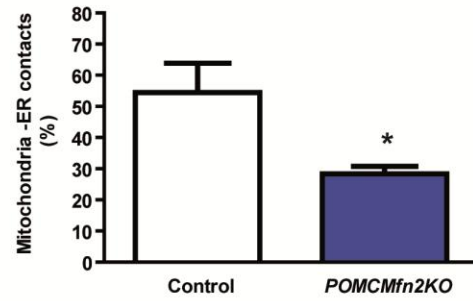

**C**

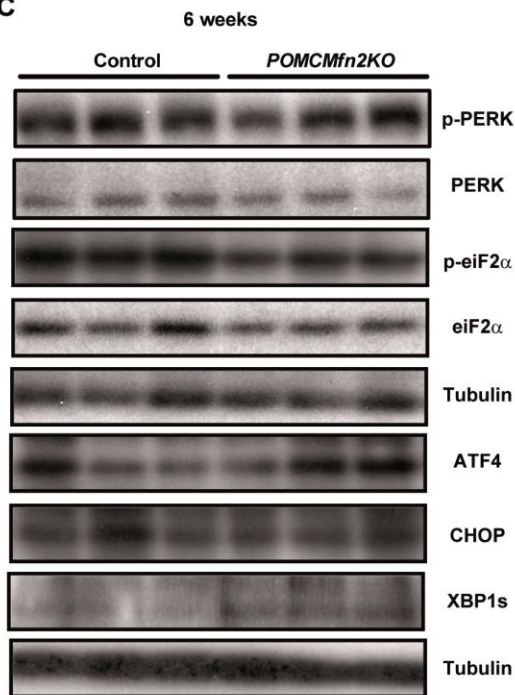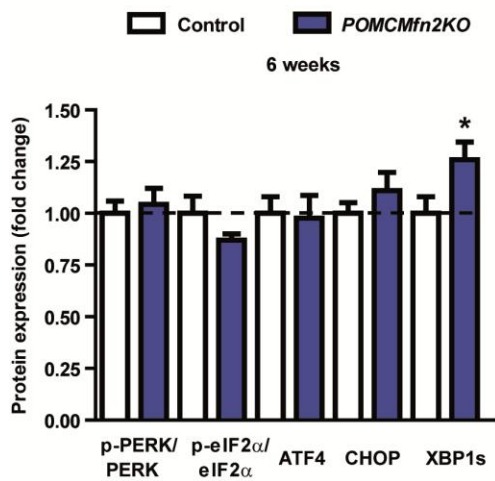

**D**

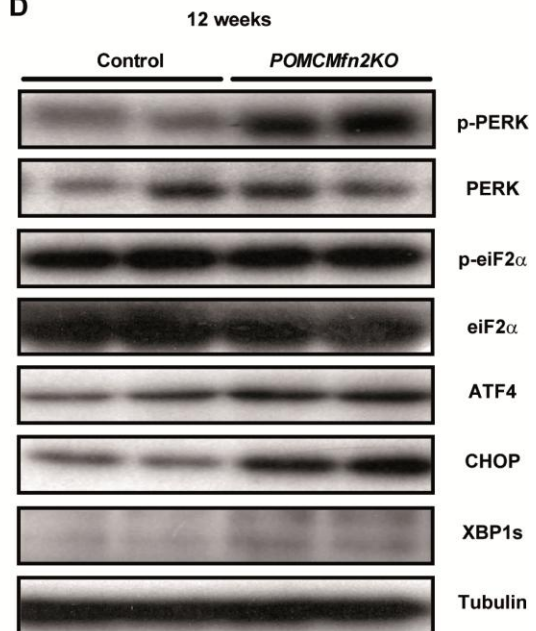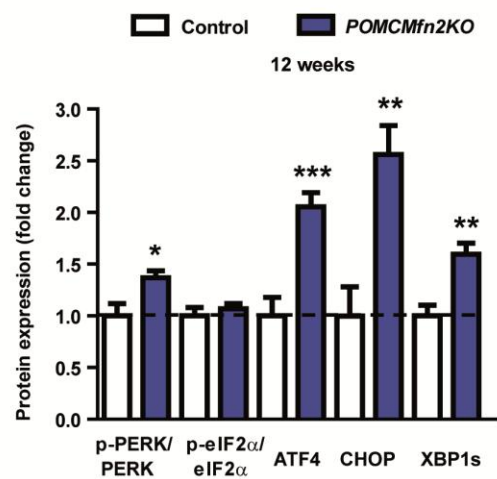

Supplementary Figure 5

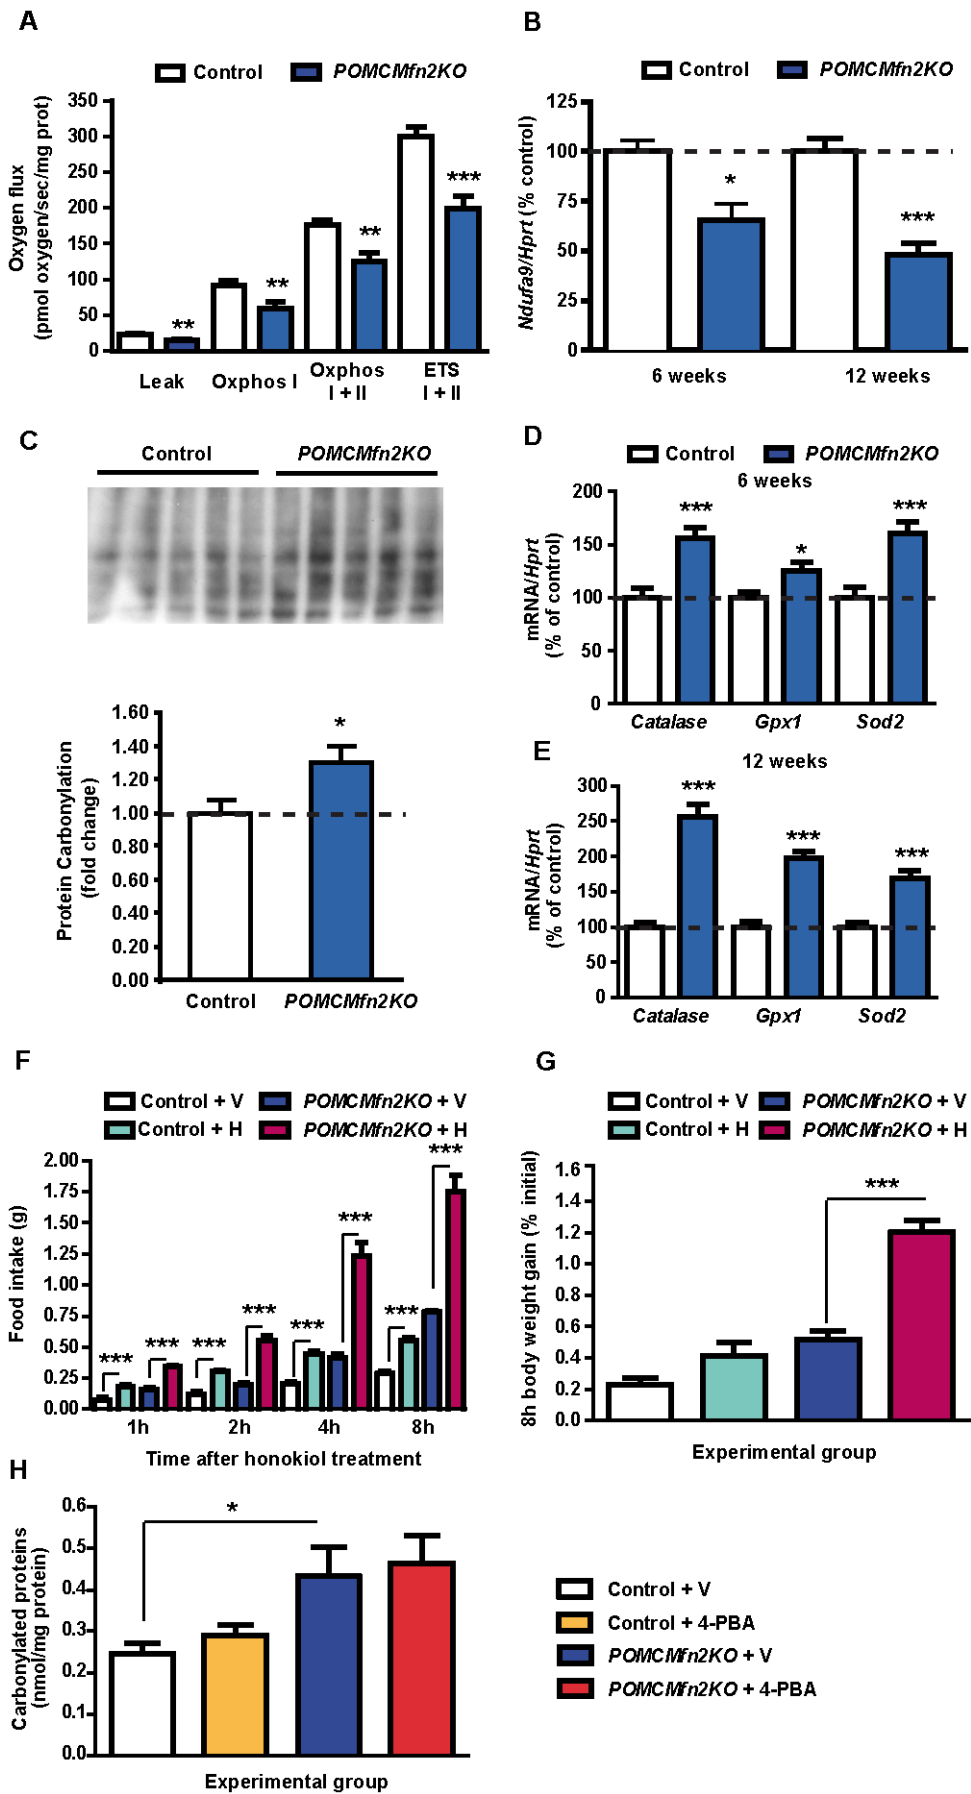

Supplementary Figure 6

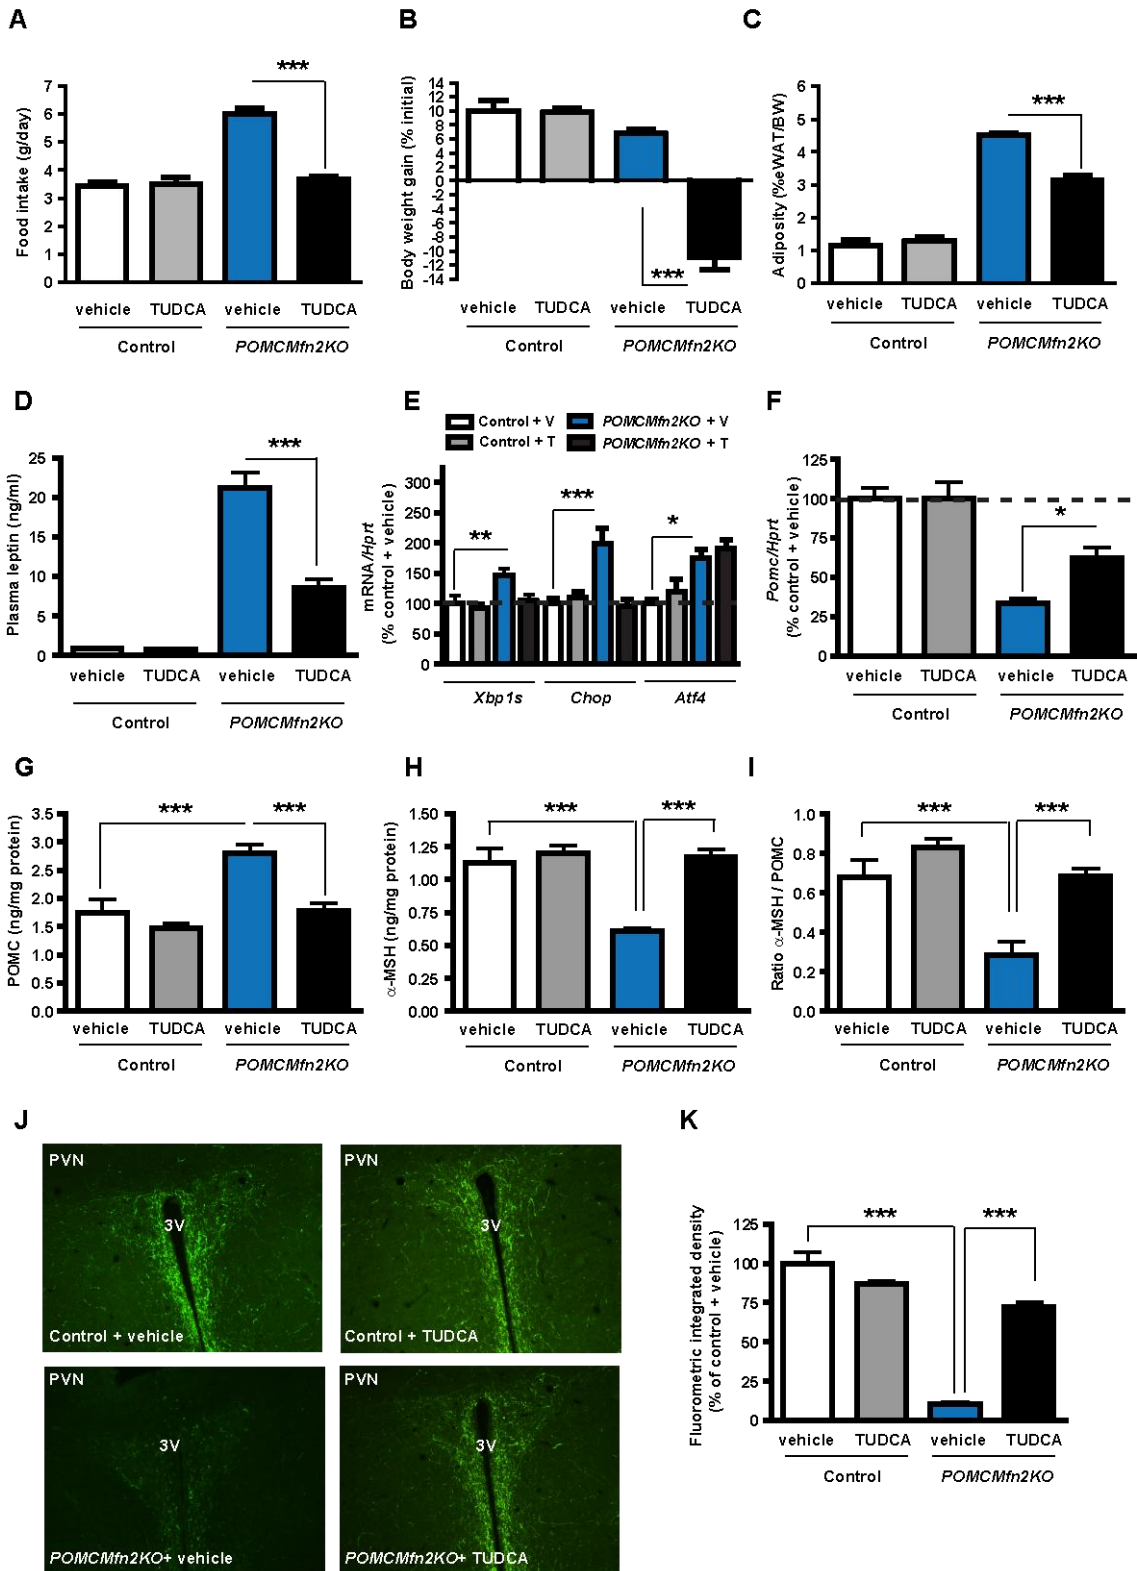

## Supplementary References

Garcia-Roves, P. M., Osler, M. E., Holmstrom, M. H., Zierath, J. R. (2008). Gain-of-function R225Q mutation in AMP-activated protein kinase gamma3 subunit increases mitochondrial biogenesis in glycolytic skeletal muscle. *J Biol Chem* 283, 35724-35734.

Holmstrom, M. H., Iglesias-Gutierrez, E., Zierath, J. R., Garcia-Roves, P. M. (2012). Tissue-specific control of mitochondrial respiration in obesity-related insulin resistance and diabetes. *Am J Physiol Endocrinol Metab* 302, E731-739.

Lindfors, C. Nilsson, I. A., Garcia-Roves, P. M., Zuberi, A. R., Karimi, M., Donahue, L. R., Roopenian, D. C., Mulder, J., Uhlen, M., Ekstrom, T. J., et al. (2011). Hypothalamic mitochondrial dysfunction associated with anorexia in the *anx/anx* mouse. *Proc Natl Acad Sci U S A* 108, 18108-18113.

Pesta, D. and Gnaiger, E. (2012). High-resolution respirometry: OXPHOS protocols for human cells and permeabilized fibers from small biopsies of human muscle. *Methods Mol Biol* 810, 25-78.
